# Supplementary material
Source: publisher site journal article supplement (https://www.dovepress.com/get_supplementary_file.php?f=351264.docx)
Supplement: Supplementary file 1 [file get_supplementary_file.php]

**
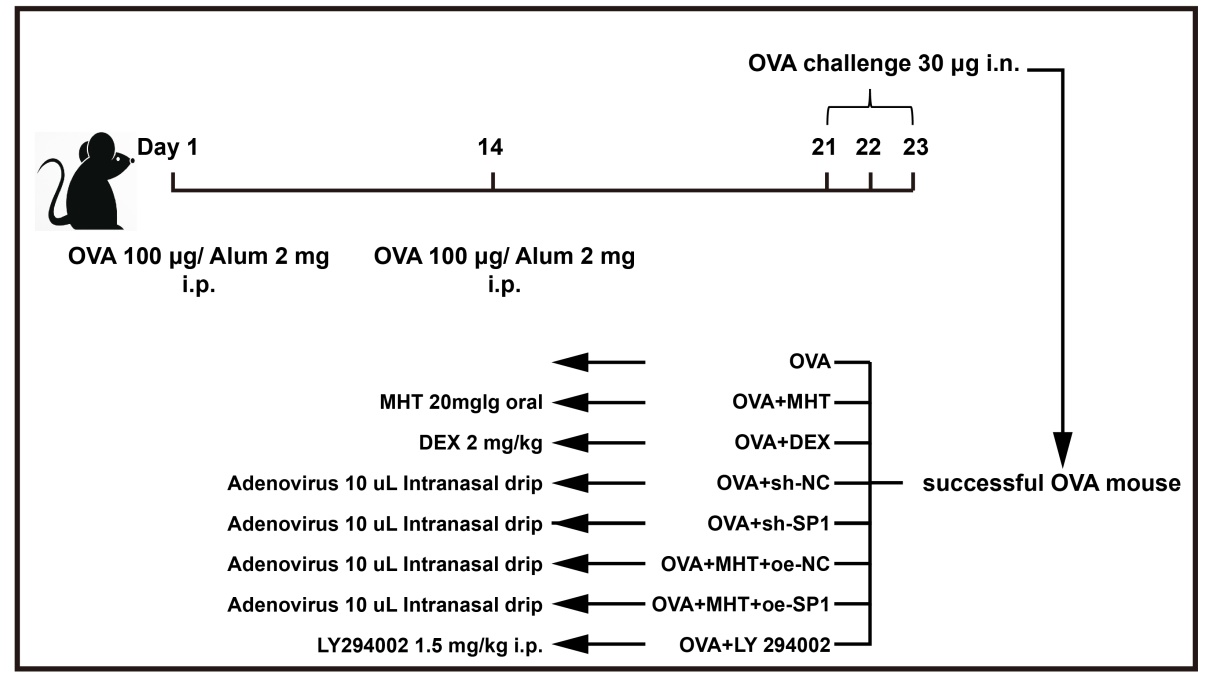
**

**Figure S1.** A schematic for experimental animal treatment.


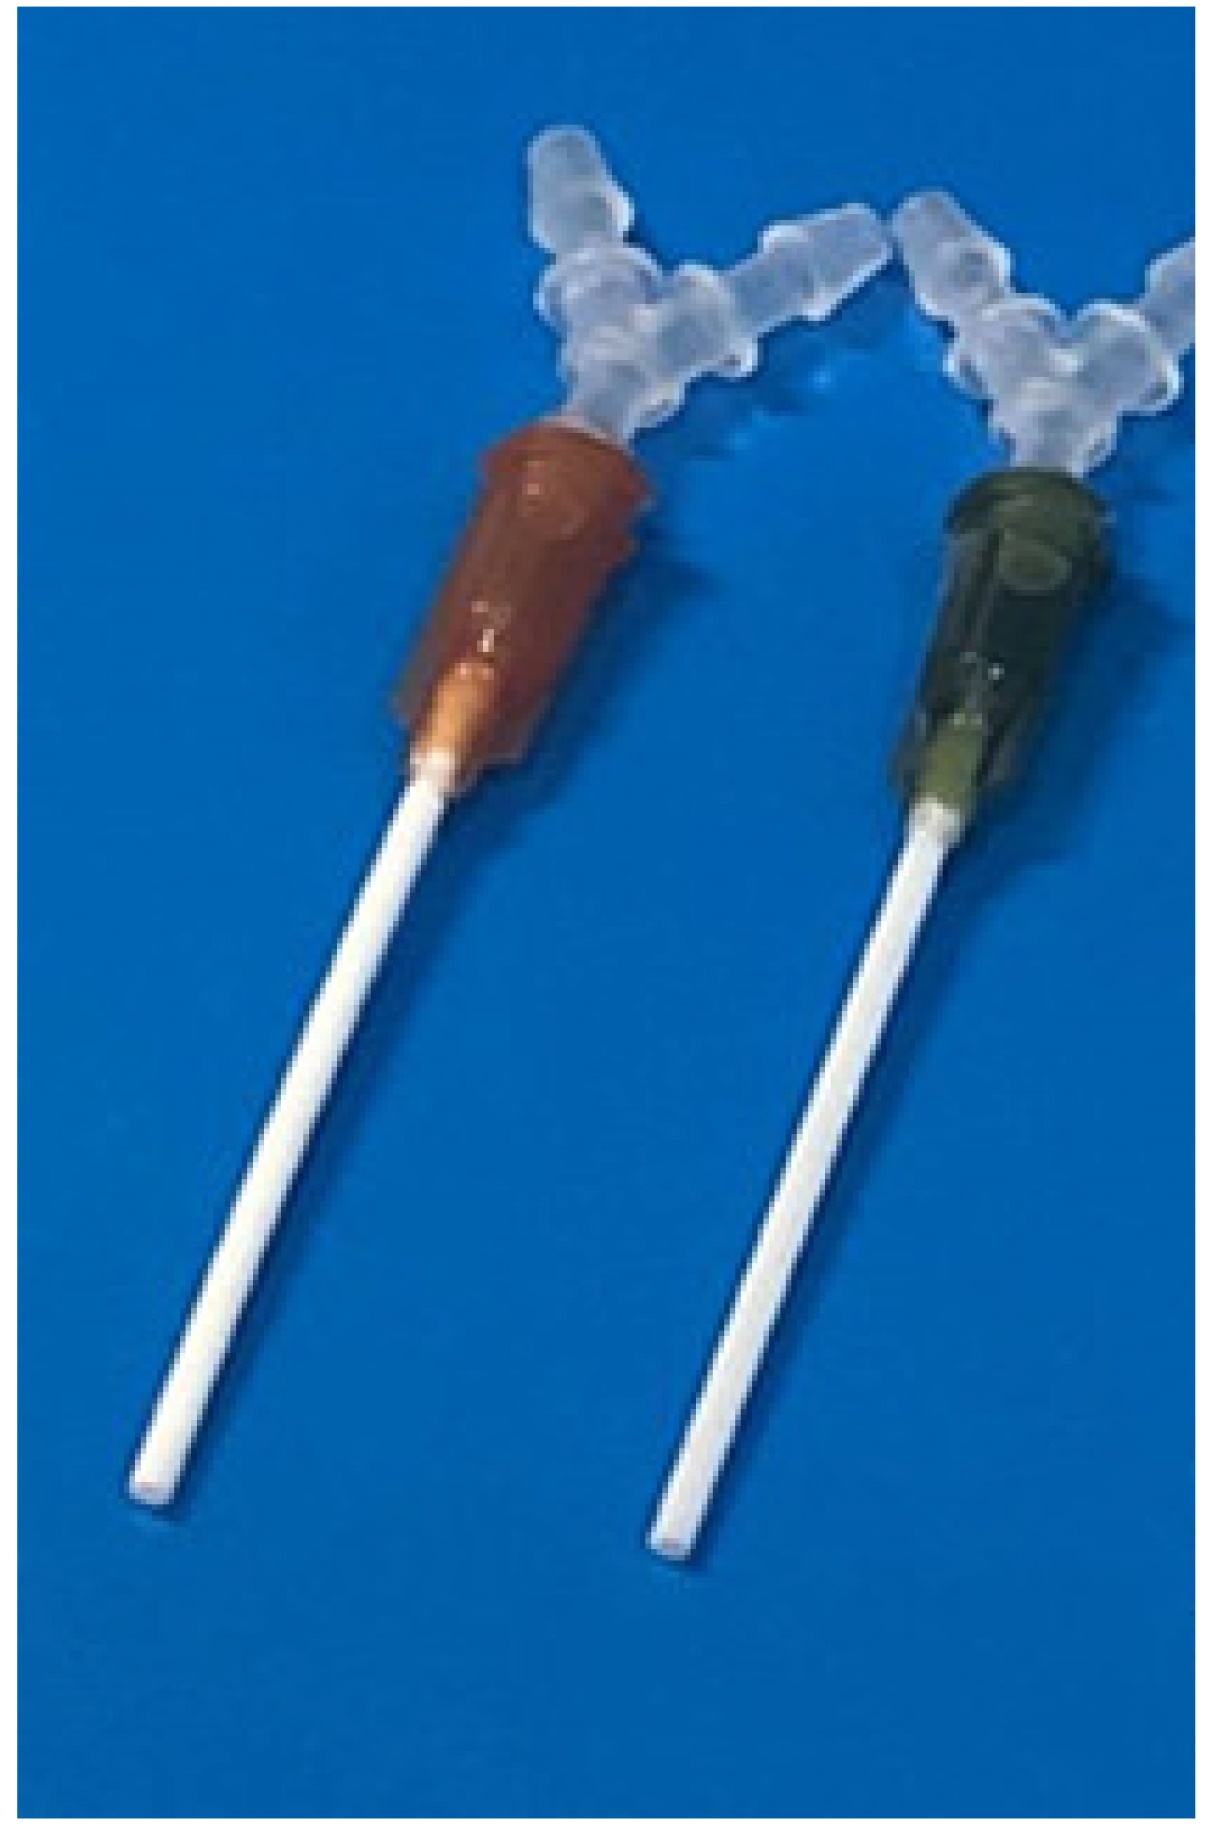


**Figure S2.** Homemade trachea for mouse tracheal intubation.


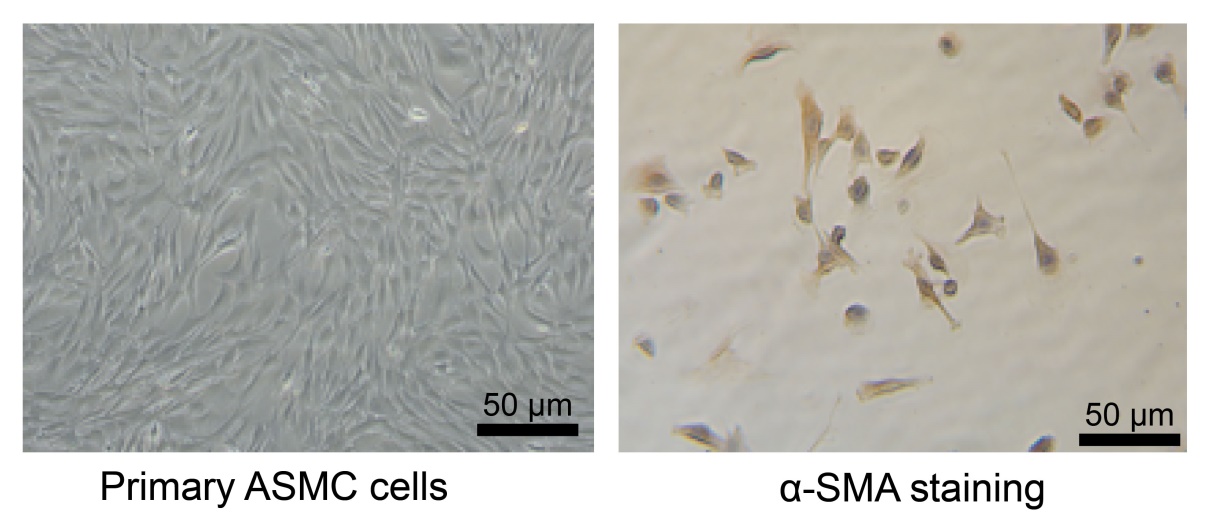


**Figure S3.** Isolation and identification of primary mouse ASMCs. Under a phase contrast microscope, ASMCs showed a characteristic “hill and valley” appearance (400 ×, A), and Immunocytochemistry staining suggested positive expression of α-SMA in ASMCs (400 ×, B). Cell experiments were repeated three times.

**Table S1** Primer sequences for reverse transcription quantitative polymerase chain reaction

| Target | Primer sequence |
| --- | --- |
| SP1 | Forward 5’-AGGGTCCGAGTCAGTCAGG-3’ |
|  | Reverse 5’-CTCGCTGCCATTGGTACTGTT-3’ |
| FGFR3 | Forward 5’-GGCCTGCGTGCTAGTGTTCT-3’ |
|  | Reverse 5’-CCTGTACCATCCTTAGCCCAG-3’ |
| COL1A2 | Forward 5’-TCGTGCCTAGCAACATGCC-3’ |
|  | Reverse 5’-TTTGTCAGAATACTGAGCAGCAA-3’ |
| COL3A1 | Forward 5’-CTGTAACATGGAAACTGGGGAAA-3’ |
|  | Reverse 5’-CCATAGCTGAACTGAAAACCACC-3’ |
| GAPDH | Forward 5’-AGGTCGGTGTGAACGGATTTG-3’ |
|  | Reverse 5’-GGGGTCGTTGATGGCAACA-3’ |
| SEMA3F | Forward 5’-ACATCAACCGAGAGCCCCTTA-3’ |
|  | Reverse 5’-CCGGACGAAGTTACCACAC-3’ |
| ASB4 | Forward 5’-ACCATCAACTGTCGTCCCAAC-3’ |
|  | Reverse 5’-ATGTTTACGTTTGCACCTCTCA-3’ |
| TOMM34 | Forward 5’-CCCAAACTCTCAGACTCTGTGG-3’ |
|  | Reverse 5’-GGAAGTGCAATCTTTGATGCAAT-3’ |
| PTPRN | Forward 5’-GCTTGTCCTGGCATGATGAC-3’ |
|  | Reverse 5’-CTGAGTTAGCAATTCCCCTGC-3’ |
| SEZ6 | Forward 5’-GAGGCGTCCACTTCGTCAC-3’ |
|  | Reverse 5’-GCTGGAGTCGGACTGGTAAAG-3’ |
| ERBB3 | Forward 5’-AGTGCGATTGGGACTCTGC-3’ |
|  | Reverse 5’-CTCCAGGTTACCCATGACCAC-3’ |
